# Supplementary material for: Preparation and structure of NHC Hg(ii) and Ag(i) macrometallocycles
Source: Royal Society of Chemistry journal article supplement (doi:10.1039/c5ce01352f), 2015-01-01
Supplement: c5ce01352f1.pdf [file c5ce01352f1.pdf]

## SUPPLEMENTARY INFORMATION

### Preparation and Structure of NHC Hg(II) and Ag(I) Macrometallo-cycles

Qing-Xiang Liu,\* Rui Liu, Yue Ding, Xiao-Jun Zhao, Zhi-Xiang Zhao, Wei Zhang  
*Tianjin Key Laboratory of Structure and Performance for Functional Molecules; Key  
Laboratory of Inorganic-Organic Hybrid Functional Material Chemistry, Ministry of  
Education; College of Chemistry, Tianjin Normal University, Tianjin 300387, China.*

\* Corresponding author, E-mail: tjnulqx@163.com

### Contents

1. CCDC numbers for complexes **1-7**.
2. The slip angles and the bond distances of O(2)-metal for complexes **1-7** (Table S1).
3. The dihedral angles of complexes **1-7** (Table S2).
4. H-Bonding geometry for complexes **1, 2** and **4-7** (Table S3).
5. The distances of  $\pi$ - $\pi$  interactions, and the distances and angles of C-H $\cdots$  $\pi$  contacts for complexes **2, 3** and **6** (Table S4).
6. Electrochemical data for precursors  $L^1H_2 \cdot (PF_6)_2$ ,  $L^3H_2 \cdot (PF_6)_2$  and  $L^4H_2 \cdot (PF_6)_2$ , and complexes **5-7** (Table S5).
7. Cyclic voltammograms of precursors  $L^1H_2 \cdot (PF_6)_2$ ,  $L^3H_2 \cdot (PF_6)_2$  and  $L^4H_2 \cdot (PF_6)_2$  (Fig. S1).
8. The  $^1H$  NMR and  $^{13}C$  NMR spectra of all intermediates, precursors and complexes **1-7** (Fig. S2- Fig. S27).

### 1. CCDC numbers for complexes 1-7

CCDC 1012248-1012254 contains the supplementary crystallographic data for complexes **1-7**. These data can be obtained free of charge via <http://www.ccdc.cam.ac.uk/conts/retrieving.html>, or from the Cambridge Crystallographic Data Centre, 12 Union Road, Cambridge, CB2 1EZ, UK; fax: (+44) 1223-336-033; or e-mail: [deposit@ccdc.cam.ac.uk](mailto:deposit@ccdc.cam.ac.uk).

### 2. The slip angles and the bond distances of O(2)-metal for complexes 1-7

**Table S1** The slip angles between O(2) and anthraquinone plane, and the bond distances of O(2)-Metal for **1-7**

| Complexes | slip angles (°) | O(2)-metal (Å) |
|-----------|-----------------|----------------|
| <b>1</b>  | 9.9(8)          | 2.942(8)       |
| <b>2</b>  | 16.5(1)         | 2.845(6)       |
| <b>3</b>  | 15.6(7)         | 2.827(6)       |
| <b>4</b>  | 12.9(9)         | 2.879(8)       |
| <b>5</b>  | 16.5(9)         | 2.954(1)       |
| <b>6</b>  | 13.7(3)         | 3.042(6)       |
| <b>7</b>  | 11.8(6)         | 2.632(4)       |

### 3. The dihedral angles of complexes 1-7

**Table S2** In the same ligand of **1-7**, the dihedral angles (°) between anthraquinone plane and two imidazole (or benzimidazole) rings (A), the dihedral angles (°) between benzene (or pyridine) rings and the adjacent imidazole (or benzimidazole) rings (B), and the dihedral angles between two imidazole (or benzimidazole) rings (C)

| Complexes | A                                     | B                                     | C       |
|-----------|---------------------------------------|---------------------------------------|---------|
| <b>1</b>  | 70.3(8), 70.9(3),<br>73.7(7), 77.8(7) | 79.5(5), 79.9(8),<br>82.4(0), 88.9(0) | 20.7(1) |
| <b>2</b>  | 53.2(2), 70.0(8)                      | 75.1(7), 77.6(3)                      | 17.6(2) |
| <b>3</b>  | 77.4(7), 84.1(6)                      | –                                     | 21.1(7) |

|          |                  |                  |         |
|----------|------------------|------------------|---------|
| <b>4</b> | 60.4(5), 64.3(8) | 60.7(7), 73.4(3) | 7.1(3)  |
| <b>5</b> | 74.4(6), 85.6(5) | –                | 12.0(4) |
| <b>6</b> | 59.9(1), 85.4(3) | –                | 39.8(7) |
| <b>7</b> | 60.1(1), 64.6(5) | 82.9(7), 83.7(6) | 7.7(1)  |

#### 4. H-Bonding geometry for complexes **1**, **2** and **4-7**.

**Table S3** H-Bonding Geometry (Å, °) for complexes **1**, **2** and **4-7**

|          | D-H···A                           | D-H      | H···A    | D···A    | D-H···A  |
|----------|-----------------------------------|----------|----------|----------|----------|
| <b>1</b> | C(12)-H(12B)···Br(1) <sup>i</sup> | 0.990(0) | 2.862(4) | 3.763(9) | 151.7(6) |
|          | C(22)-H(22)···Br(8) <sup>i</sup>  | 0.950(0) | 2.832(8) | 3.590(6) | 137.5(7) |
| <b>2</b> | C(18)-H(18)···O(3) <sup>ii</sup>  | 0.950(1) | 2.286(1) | 3.150(6) | 150.9(3) |
| <b>4</b> | C(11)-H(11)···I(6) <sup>i</sup>   | 0.949(8) | 2.894(3) | 3.757(1) | 151.5(9) |
|          | C(39)-H(39A)···O(3) <sup>ii</sup> | 0.988(8) | 2.574(6) | 2.951(0) | 102.5(0) |
|          | C(14)-H(14B)···I(4) <sup>i</sup>  | 0.989(1) | 3.027(0) | 3.879(9) | 145.1(1) |
| <b>5</b> | C(22)-H(22A)···F(6) <sup>i</sup>  | 0.990(8) | 2.499(8) | 3.075(3) | 116.7(1) |
|          | C(4)-H(4)···F(1) <sup>i</sup>     | 0.951(2) | 2.498(9) | 3.319(6) | 144.5(1) |
|          | C(28)-H(28B)···F(5) <sup>i</sup>  | 0.980(4) | 2.489(1) | 3.335(3) | 144.3(8) |
| <b>6</b> | C(8)-H(8)···F(1) <sup>i</sup>     | 0.949(6) | 2.500(5) | 3.385(4) | 155.0(8) |
| <b>7</b> | C(12)-H(12)···O(3) <sup>i</sup>   | 0.949(5) | 2.593(5) | 3.269(1) | 128.0(4) |
|          | C(39)-H(39A)···N(1) <sup>i</sup>  | 0.990(2) | 2.590(0) | 3.520(3) | 156.5(0) |
|          | C(37)-H(37)···F(1) <sup>i</sup>   | 0.950(1) | 2.422(1) | 3.311(2) | 155.7(0) |
|          | C(6)-H(6)···F(4) <sup>i</sup>     | 0.990(9) | 2.536(3) | 3.327(8) | 136.7(2) |

Symmetry code: i:  $x, -2 + y, z$  for **1**; ii:  $-2 + x, y, -1 + z$  for **2**; i:  $-1 + x, y, -1 + z$ ; ii:  $-0.5 + x, 1.5 - y, -0.5 + z$  for **4**; i:  $2 - x, 2 - y, -2 - z$  for **5**; i:  $-1 + y, -x + y, -z$  for **6**; i:  $3 + x, y, -1 + z$  for **7**.

#### 5. The distances of $\pi$ - $\pi$ interactions, and the distances and angles of C-H··· $\pi$ contacts for complexes **2**, **3** and **6**.

**Table S4** Distances (Å) of  $\pi$ - $\pi$  interactions, and distances (Å) and angles (°) of C-H $\cdots\pi$  contacts for complexes **2**, **3** and **6**

| Complexes | $\pi$ - $\pi$                              |                                            | C-H $\cdots\pi$ |                 |
|-----------|--------------------------------------------|--------------------------------------------|-----------------|-----------------|
|           | face-to-face                               | center-to-center                           | H $\cdots\pi$   | C-H $\cdots\pi$ |
| <b>2</b>  | –                                          | –                                          | 2.440(8)        | 166.7(8)        |
| <b>3</b>  | 3.547(1) (imidazole)                       | 3.959(6) (imidazole)                       | –               | –               |
|           | 3.513(5) (anthraquinone)                   | 3.613(5) (anthraquinone)                   |                 |                 |
| <b>6</b>  | 3.393(1) (benzimidazole,<br>anthraquinone) | 3.772(6) (benzimidazole,<br>anthraquinone) | –               | –               |

**6. Electrochemical data for precursors  $L^1H_2 \cdot (PF_6)_2$ ,  $L^3H_2 \cdot (PF_6)_2$  and  $L^4H_2 \cdot (PF_6)_2$ , and complexes 5-7**

**Table S5.** Electrochemical data in room temperature for precursors  $L^1H_2 \cdot (PF_6)_2$ ,  $L^3H_2 \cdot (PF_6)_2$  and  $L^4H_2 \cdot (PF_6)_2$ , and complexes **5-7** in  $CH_3CN$  using 0.1 M  $nBu_4NBF_4$

| Compounds               | Solvent  | $E^{o1}$ (V)<br>vs. SCE | $E^{o2}$ (V)<br>vs. SCE |
|-------------------------|----------|-------------------------|-------------------------|
| $L^1H_2 \cdot (PF_6)_2$ | $CH_3CN$ | -0.94                   | -1.45                   |
| <b>2</b>                |          |                         |                         |
| <b>5</b>                | $CH_3CN$ | -0.63                   | -1.06                   |
| $L^3H_2 \cdot (PF_6)_2$ | $CH_3CN$ | -0.99                   | -1.72                   |
| <b>2</b>                |          |                         |                         |
| <b>6</b>                | $CH_3CN$ | -0.98                   | -1.66                   |
| $L^4H_2 \cdot (PF_6)_2$ | $CH_3CN$ | -0.99                   | -1.73                   |
| <b>2</b>                |          |                         |                         |
| <b>7</b>                | $CH_3CN$ | -0.99                   | -1.68                   |

**7. Cyclic voltammograms of precursors  $L^1H_2 \cdot (PF_6)_2$ ,  $L^3H_2 \cdot (PF_6)_2$  and  $L^4H_2 \cdot (PF_6)_2$ .**

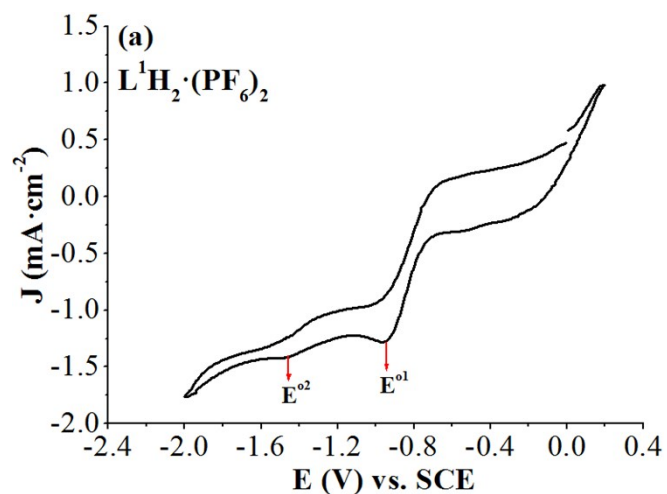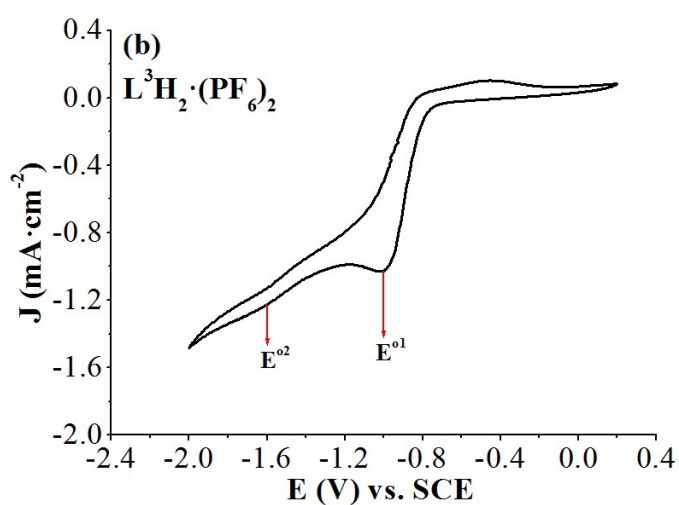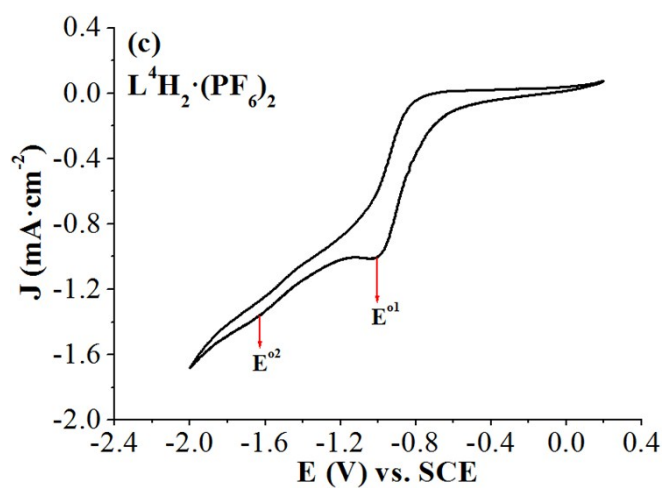

**Fig. S1** Cyclic voltammograms of precursors  $L^1H_2 \cdot (PF_6)_2$ ,  $L^3H_2 \cdot (PF_6)_2$  and  $L^4H_2 \cdot (PF_6)_2$  in  $CH_3CN$  using 0.1 M  $nBu_4NBF_4$  as the supporting electrolyte.

**8. The  $^1H$  NMR spectra and  $^{13}C$  NMR spectra for all intermediates, precursors**

and complexes 1-7.

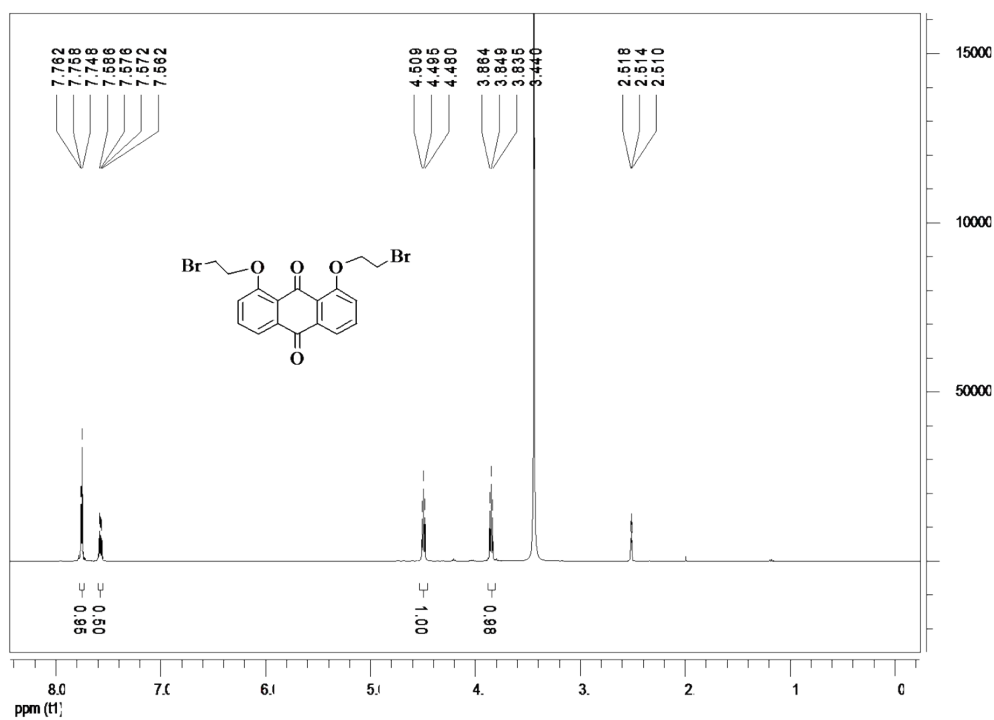

**Fig. S2.** The  $^1\text{H}$  NMR (400 MHz,  $\text{DMSO-}d_6$ ) spectrum for 1,8-bis(2-bromoethoxy)-9,10-anthraquinone.

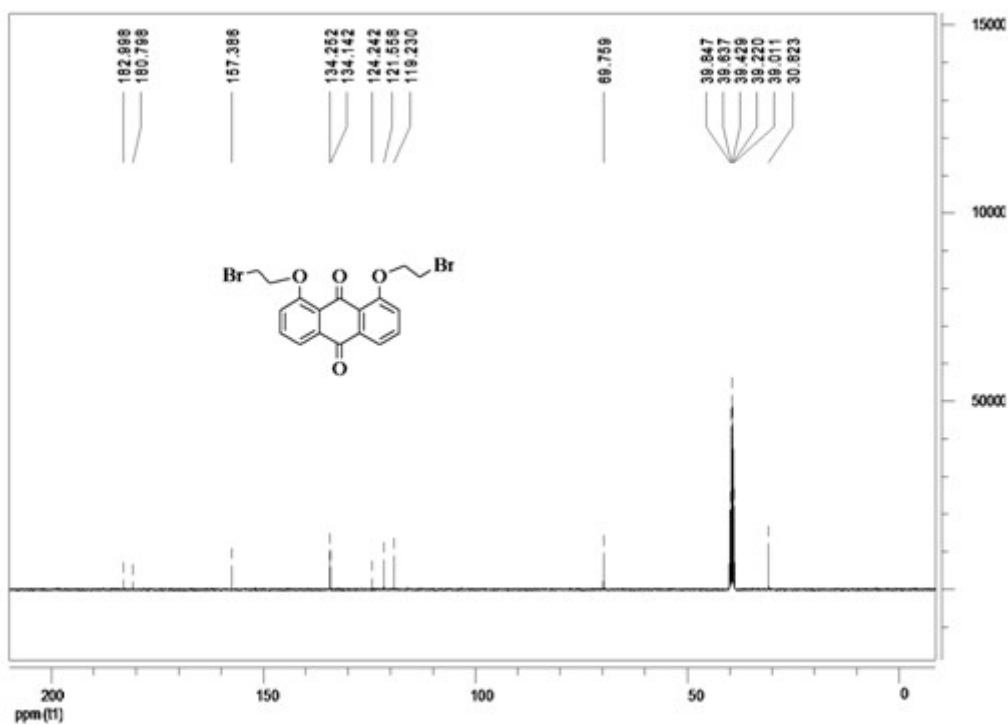

**Fig. S3.** The  $^{13}\text{C}$  NMR (100 MHz,  $\text{DMSO-}d_6$ ) spectrum for 1,8-bis(2-bromoethoxy)-9,10-anthraquinone.

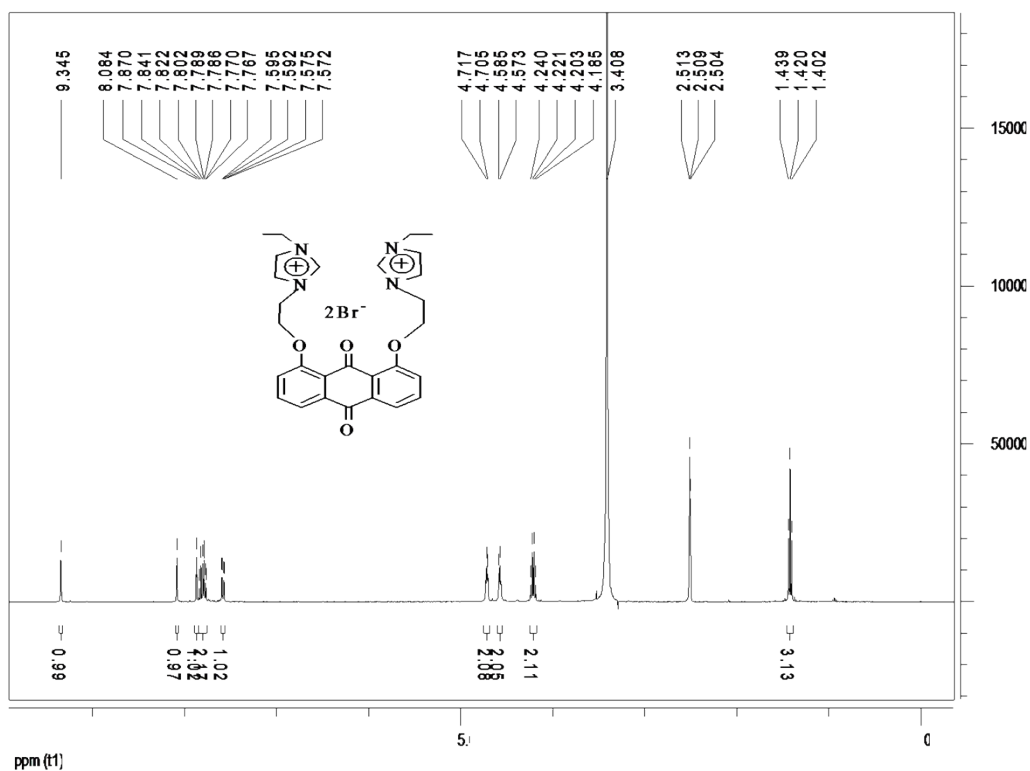

Fig. S4. The  $^1\text{H}$  NMR (400 MHz,  $\text{DMSO-}d_6$ ) spectrum for  $\text{L}^1\text{H}_2\cdot\text{Br}_2$ .

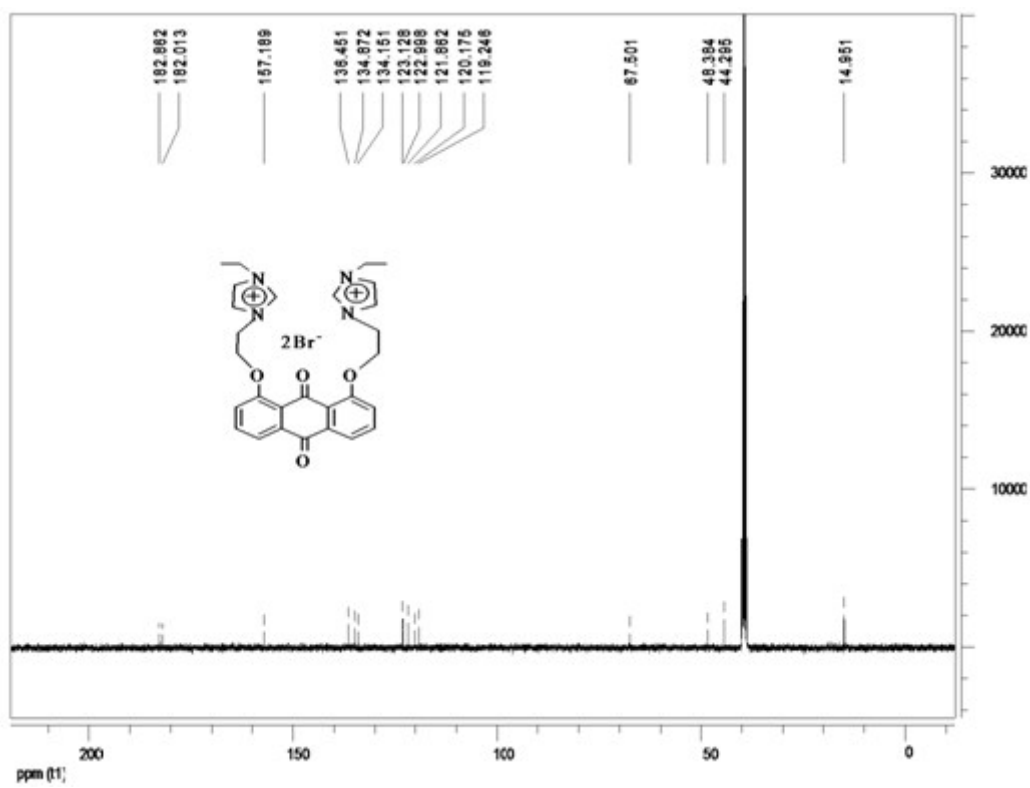

Fig. S5. The  $^{13}\text{C}$  NMR (100 MHz,  $\text{DMSO-}d_6$ ) spectrum for  $\text{L}^1\text{H}_2\cdot\text{Br}_2$ .

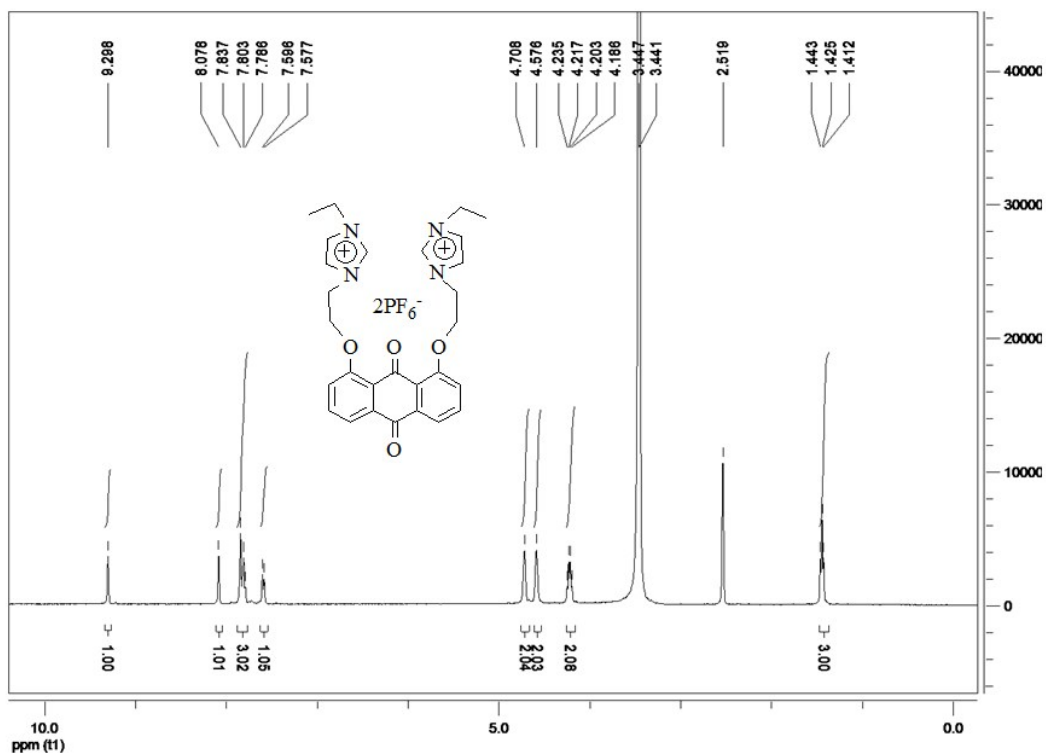

Fig. S6. The  $^1\text{H}$  NMR (400 MHz,  $\text{DMSO-}d_6$ ) spectrum for  $\text{L}^1\text{H}_2 \cdot (\text{PF}_6)_2$ .

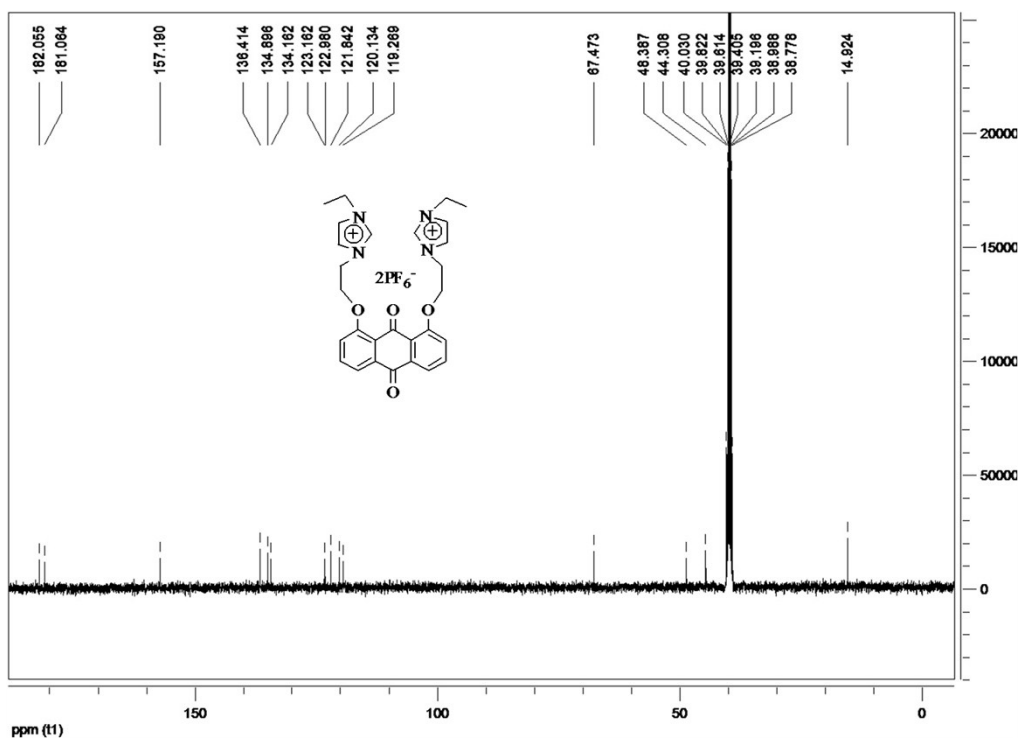

Fig. S7. The  $^{13}\text{C}$  NMR (100 MHz,  $\text{DMSO-}d_6$ ) spectrum for  $\text{L}^1\text{H}_2 \cdot (\text{PF}_6)_2$ .



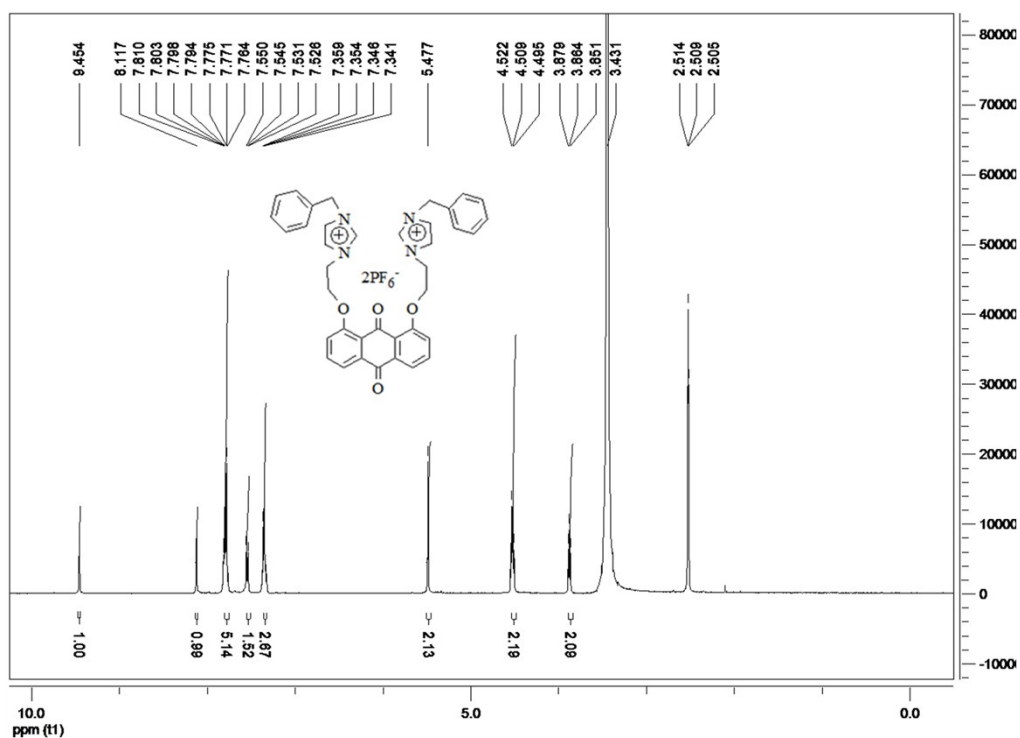

Fig. S8. The  $^1H$  NMR (400 MHz,  $DMSO-d_6$ ) spectrum for  $L^2H_2 \cdot (PF_6)_2$ .

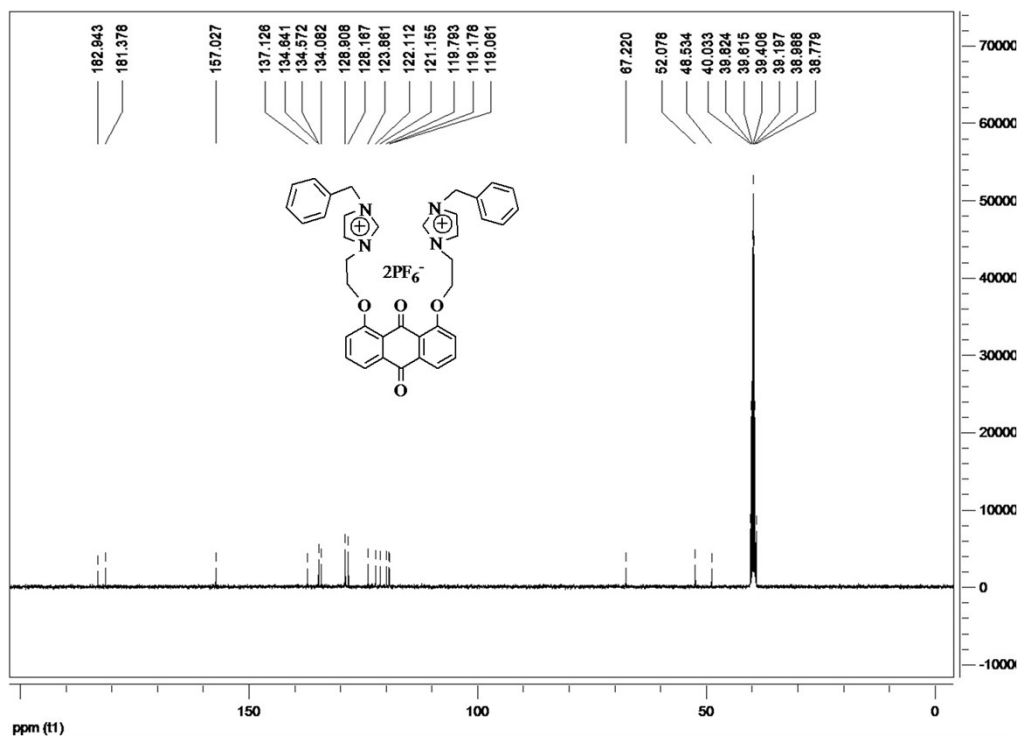

Fig. S9. The  $^{13}C$  NMR (100 MHz,  $DMSO-d_6$ ) spectrum for  $L^2H_2 \cdot (PF_6)_2$ .

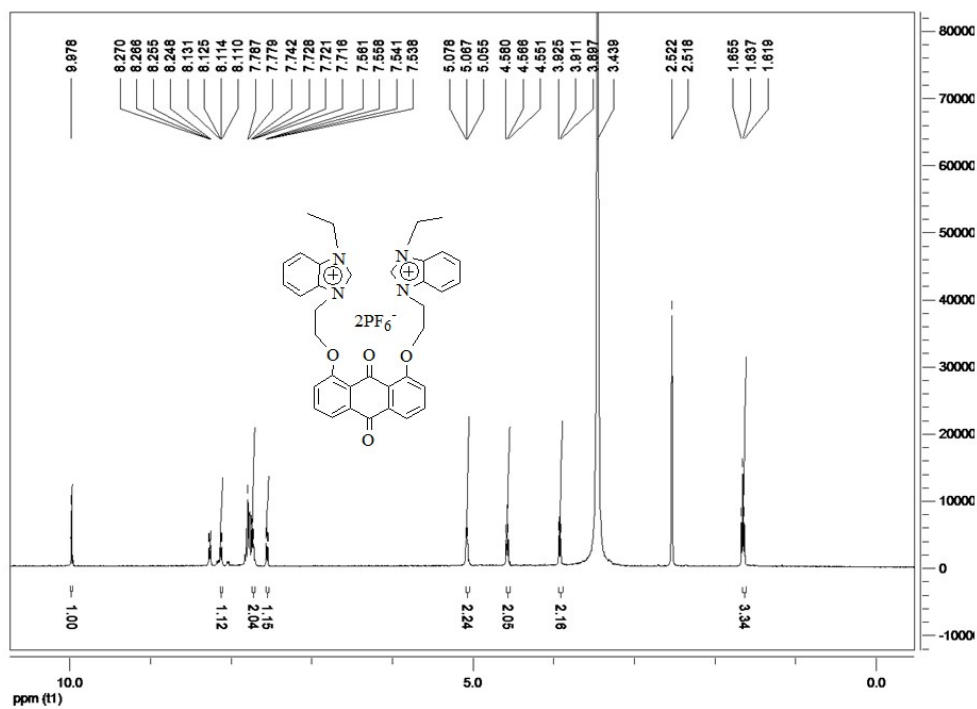

Fig. S10. The  $^1H$  NMR (400 MHz,  $DMSO-d_6$ ) spectrum for  $L^3H_2 \cdot (PF_6)_2$ .

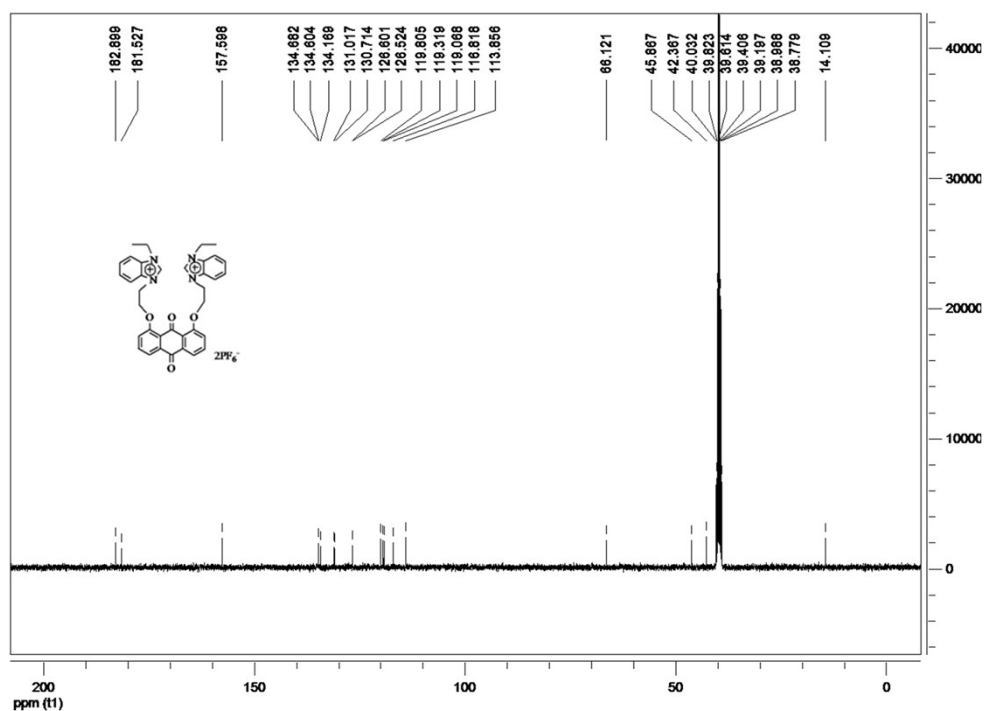

Fig. S11. The  $^{13}C$  NMR (100 MHz,  $DMSO-d_6$ ) spectrum for  $L^3H_2 \cdot (PF_6)_2$ .

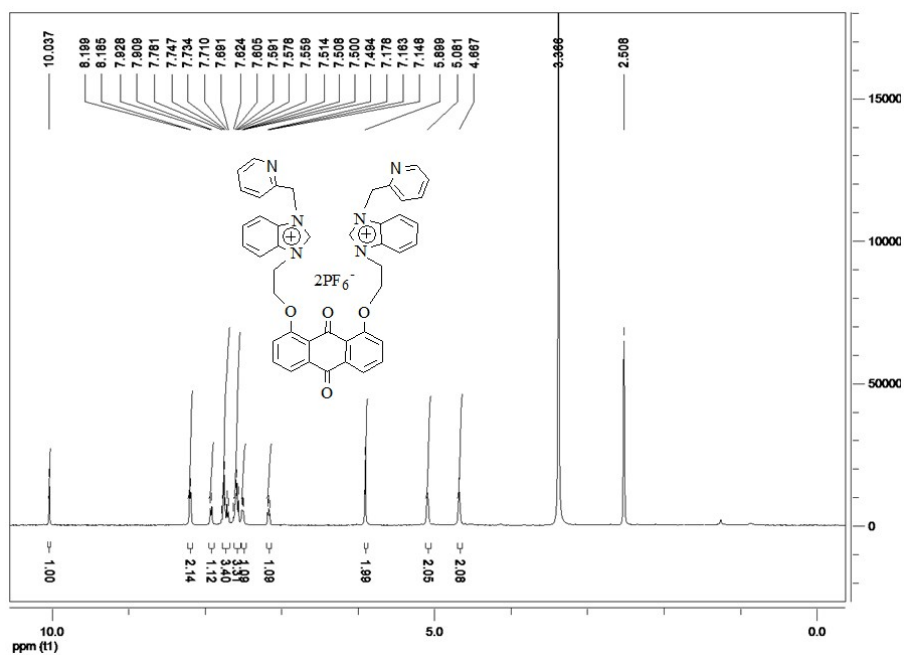

Fig. S12. The  $^1\text{H}$  NMR (400 MHz,  $\text{DMSO-}d_6$ ) spectrum for  $\text{L}^4\text{H}_2 \cdot (\text{PF}_6)_2$ .

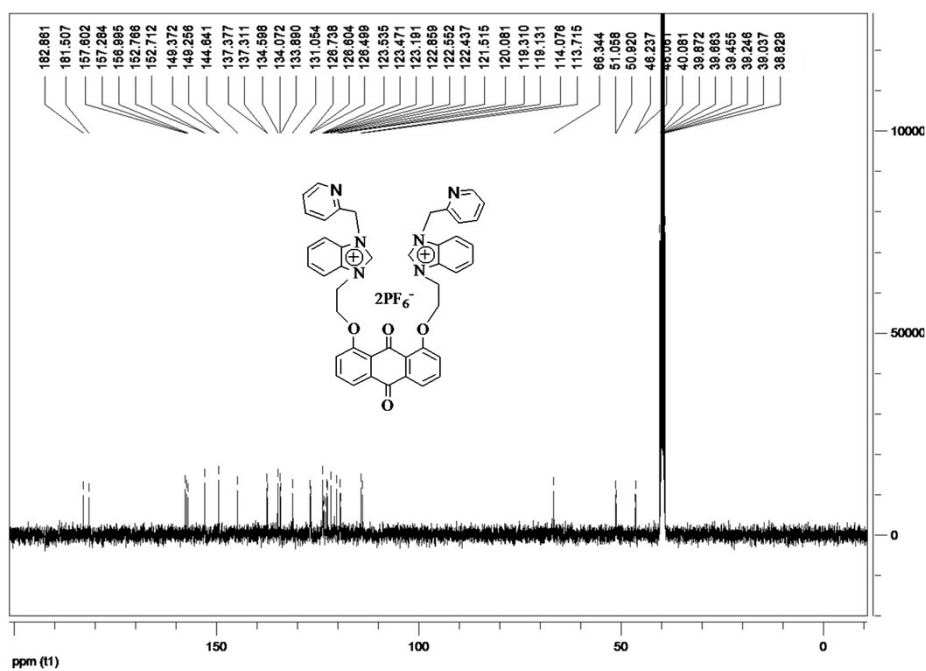

Fig. S13. The  $^{13}\text{C}$  NMR (100 MHz,  $\text{DMSO-}d_6$ ) spectrum for  $\text{L}^4\text{H}_2 \cdot (\text{PF}_6)_2$ .

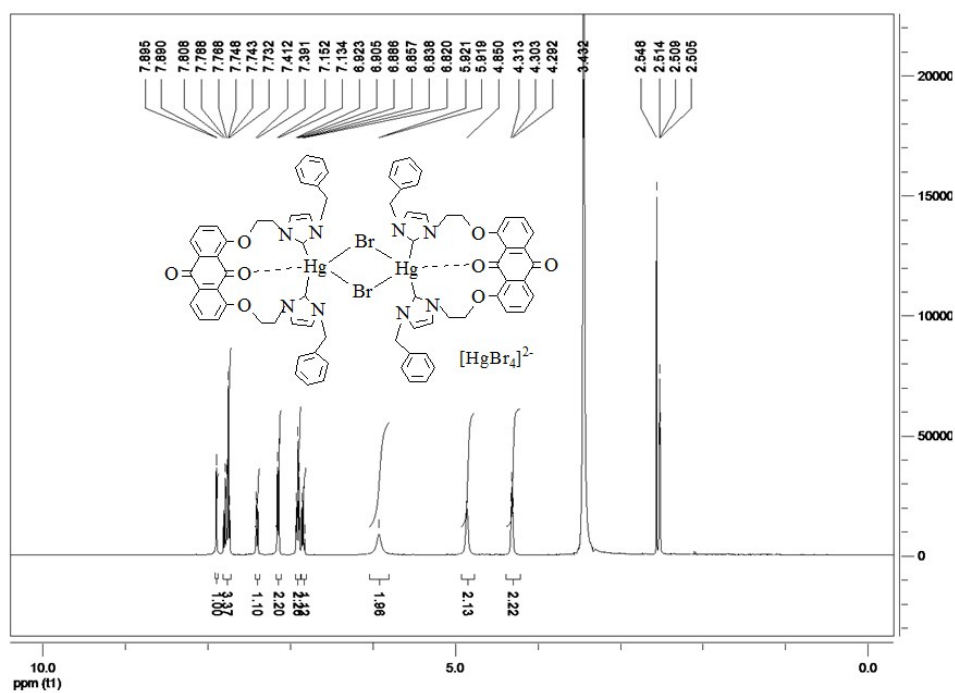

Fig. S14. The  $^1\text{H}$  NMR (400 MHz,  $\text{DMSO-}d_6$ ) spectrum for **1**.

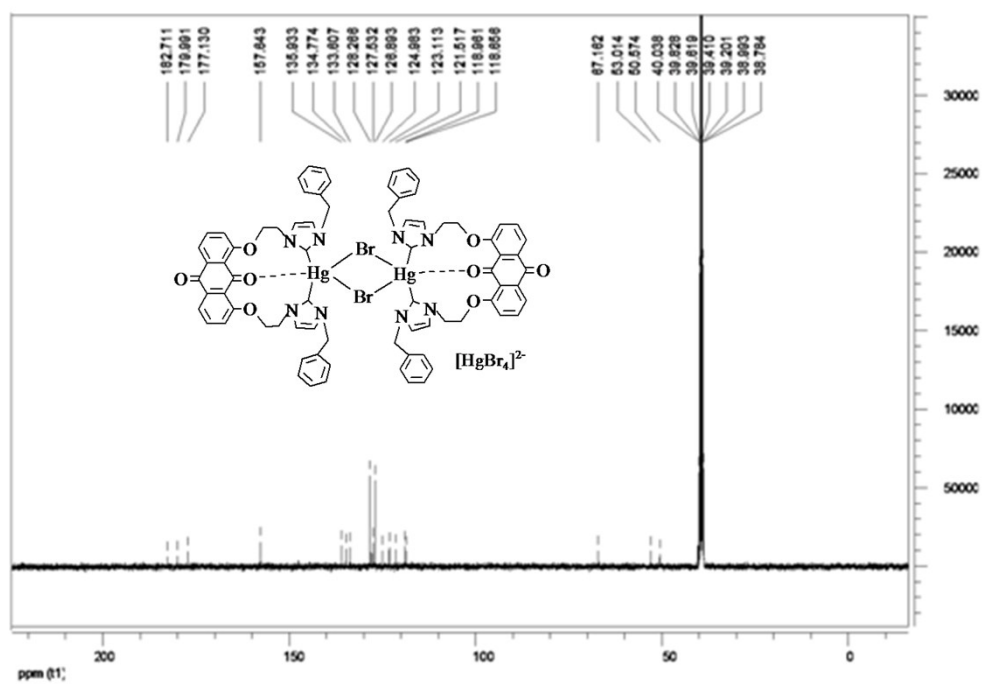

Fig. S15. The  $^{13}\text{C}$  NMR (100 MHz,  $\text{DMSO-}d_6$ ) spectrum for **1**.

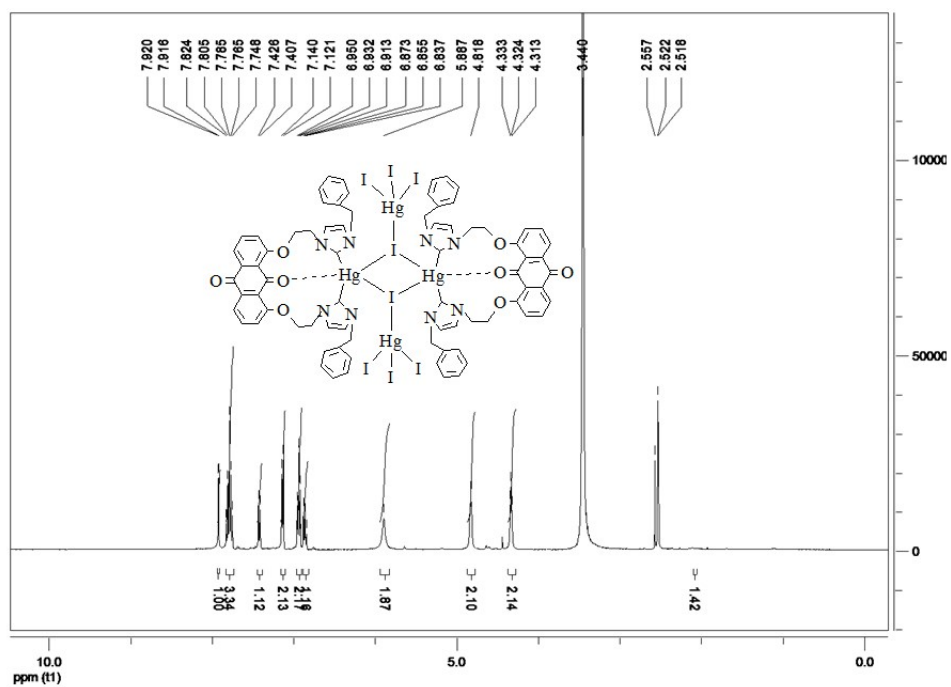

Fig. S16. The  $^1\text{H}$  NMR (400 MHz,  $\text{DMSO-}d_6$ ) spectrum for 2.

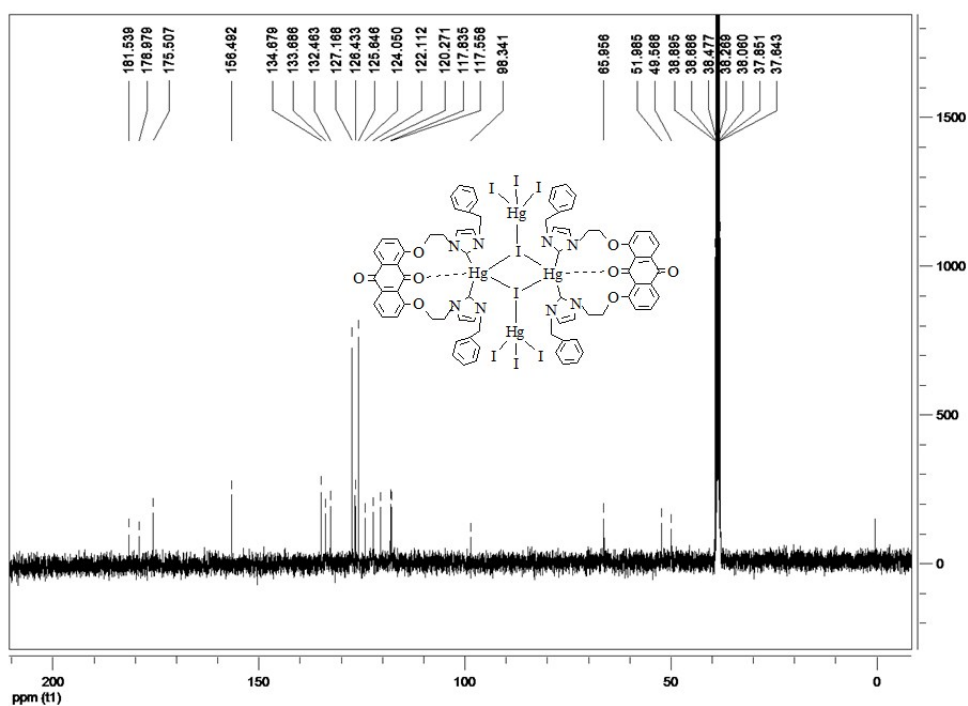

Fig. S17. The  $^{13}\text{C}$  NMR (100 MHz,  $\text{DMSO-}d_6$ ) spectrum for 2.





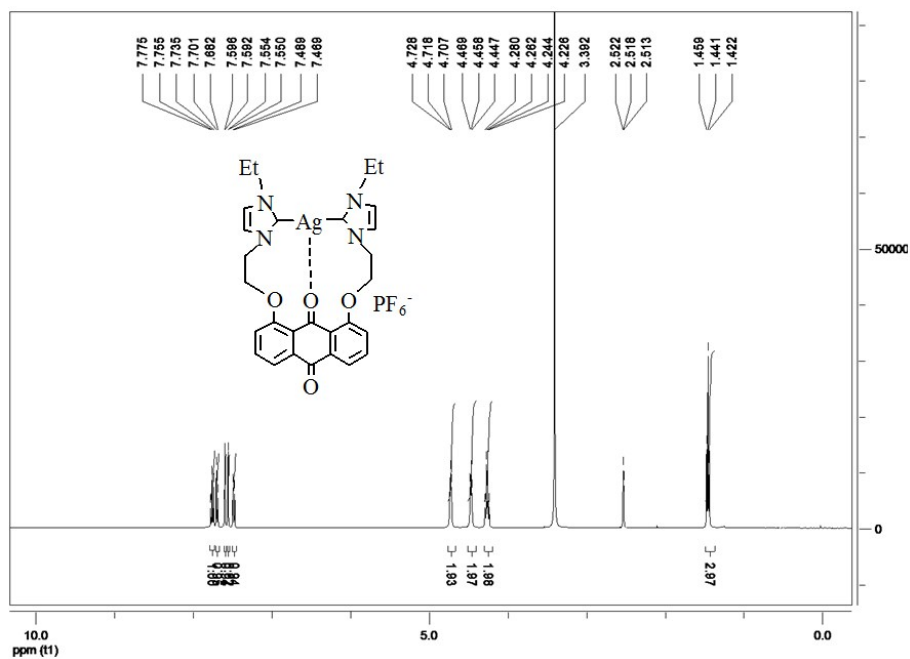

Fig. S22. The <sup>1</sup>H NMR (400 MHz, DMSO-*d*<sub>6</sub>) spectrum for 5.

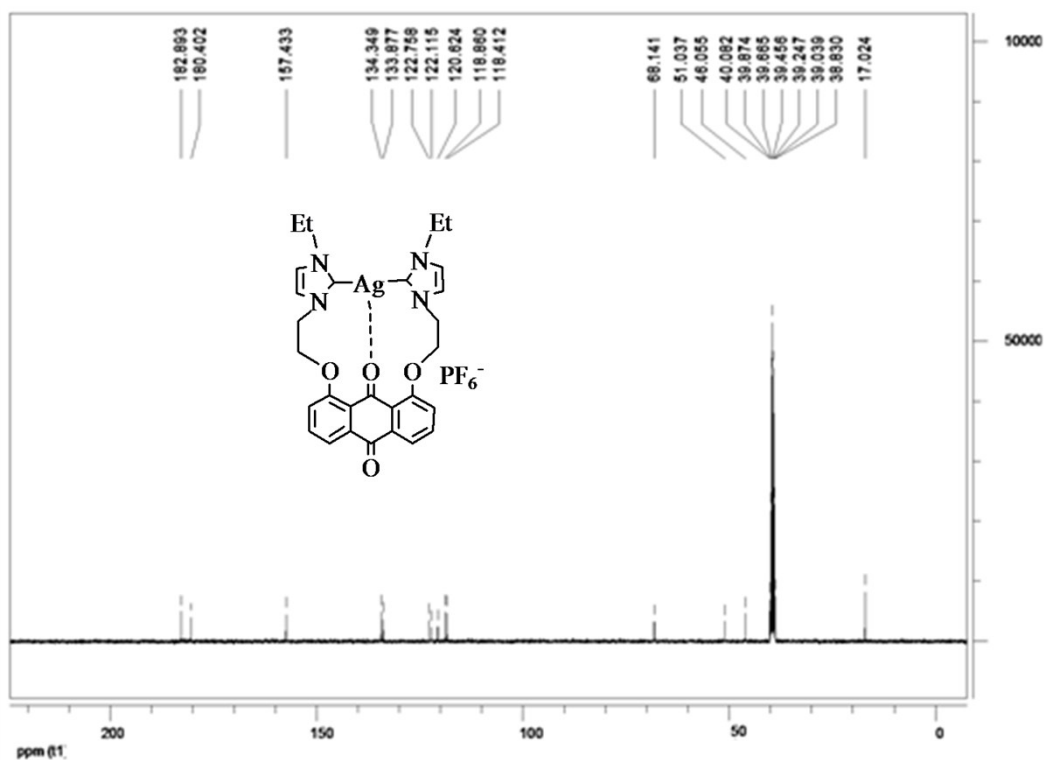

Fig. S23. The <sup>13</sup>C NMR (100 MHz, DMSO-*d*<sub>6</sub>) spectrum for 5.





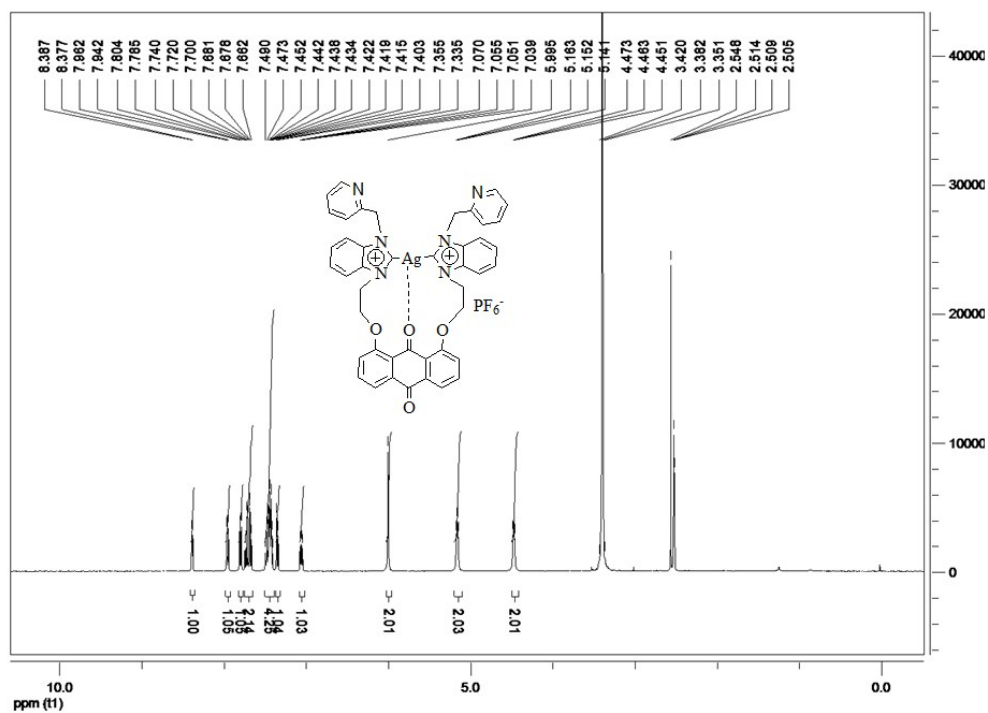

Fig. S26. The <sup>1</sup>H NMR (400 MHz, DMSO-*d*<sub>6</sub>) spectrum for 7.

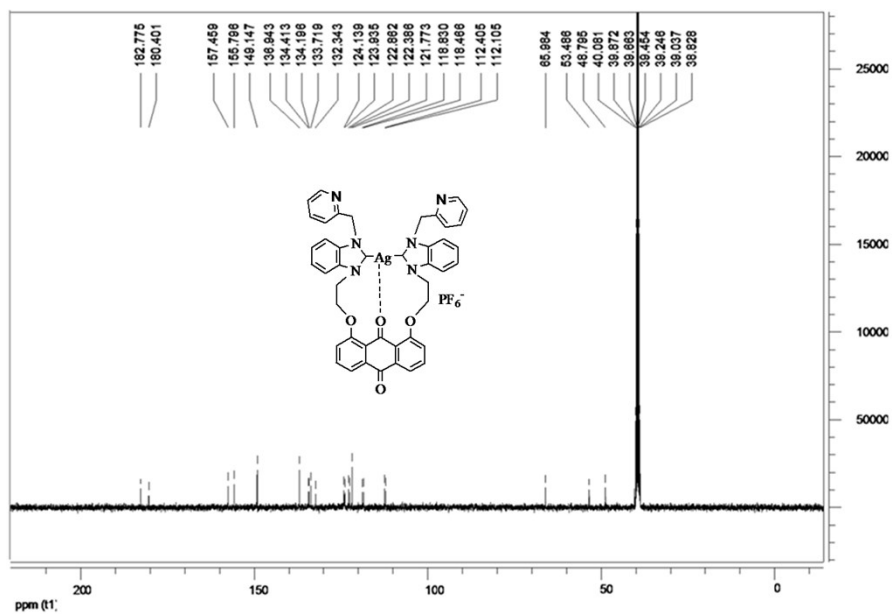

Fig. S27. The <sup>13</sup>C NMR (100 MHz, DMSO-*d*<sub>6</sub>) spectrum for 7.
